# Supplementary material for: The Linear ubiquitin chain assembly complex acts as a liver tumor suppressor and inhibits hepatocyte apoptosis and hepatitis
Source: Hepatology. 2017 Apr 10;65(6):1963–78. doi: 10.1002/hep.29074 (PMC5485060; doi:10.1002/hep.29074)
Supplement: Supplementary file 1 — Supporting Information [file HEP-65-1963-s001.pdf]

## Supporting information

### HISTOLOGY AND IMMUNOHISTOCHEMISTRY

Resected livers were fixed in 10% formalin (Sigma-Aldrich, St. Louis, MO) and embedded in paraffin blocks and cut into sections of 4  $\mu$ m in thickness. H&E staining was performed to observe tissue structure. Sirius Red staining was performed to detect fibrotic lesions. As for antigen retrieval, heat-induced epitope retrieval with citrate buffer (10 mM sodium citrate, pH 6.0) was used for Ki-67, CK19 and GS staining. For Ly6G and  $\gamma$ H2AX staining, Tris-EDTA buffer (Tris 10 mM, EDTA 1 mM, pH 8.0) was employed. For F4/80 staining, proteinase K (10  $\mu$ g/mL) diluted in TEX buffer (50 mM Tris, 1 mM EDTA, 0.5% Triton X-100, pH 8.0) was utilized. Used primary antibodies are listed in Supporting Table. HRP-conjugated antibodies (Southern Biotech, Birmingham, AL) were used as secondary antibodies. For Ki-67, Ly6G and  $\gamma$ H2AX staining, tyramide signal amplification system (Perkin Elmer, Waltham, MA) was utilized to enhance the signals. 3,3'-diaminobenzidine (DAB) was used as a substrate for CK19 and GS staining. To detect cell death, cleaved caspase-3 staining was performed with epitope retrieval using citrate buffer followed by terminal deoxynucleotidyl transferase dUTP nick end labeling (TUNEL) using ApopTag Red In Situ Apoptosis Detection Kit (Merck Millipore, Billerica, MA). Nuclear counterstain was performed with DAPI, which is indicated in blue in the figures.

### IMMUNOPRECIPITATION

For an immunoprecipitation for a FADD-associated complex, hepatocyte lysates from *Hoip*<sup>flox</sup> and *Hoip*<sup>Ahep</sup> mice were pre-cleared with Sepharose CL-4B (Sigma-Aldrich) for 2 hours. Protein G-coupled sepharose (GE Healthcare, Little Chalfont, UK) was blocked with 1% BSA in IP lysis buffer for 1 hour and washed extensively with IP lysis buffer prior to incubation. Pre-cleared lysates were incubated overnight with blocked Protein G-coupled sepharose and anti-FADD (M-19) antibody (Santa Cruz, Dallas, TX) at 4°C. Beads were washed 5 times with ice-cold IP lysis buffer and vortexed, and proteins were eluted in 1x LDS buffer with 12.5 mM DTT at 92°C. TNF-RSC pull

down with anti-FLAG M2 beads were previously described by Haas et al., 2009 and Draber et al., 2015.

## **FLOW CYTOMETRIC ANALYSIS OF LIVER IMMUNE CELLS**

Livers were mechanically dissociated in PBS with a plunger of 5 mL syringes and cell suspensions were filtered through nylon mesh. Cells were washed with PBS and red blood cells were removed with RBC lysis buffer (R&D systems, Minneapolis, MN). Cells were subsequently incubated with anti-mouse CD16/CD32 (eBioscience, San Diego, CA) and Fixable Viability Dye eFluor 660 (eBioscience) for 30 min prior to incubation with antibodies. Cells were stained with fluorophore-coupled antibodies (listed in Supporting Table) for 1 hour. For absolute quantification, 123count eBeads (eBioscience) was added to cell suspensions and cells were measured on Fortessa LSR II (BD Biosciences, Franklin Lakes, NJ). Analysis was performed using FlowJo 7.6.5 (Tree Star, Ashland, OR).

## **ISOLATION OF MOUSE PRIMARY HEPATOCYTES**

Primary hepatocytes were isolated from seven-to-twelve week-old mice. Mice were anesthetized and were cannulated via inferior vena cava and portal vein was then incised. Mouse livers were perfused with warm perfusion buffer (NaCl 8 g/L, KCl 0.2 g/L, Na<sub>2</sub>HPO<sub>4</sub> 33 mg/L, HEPES 2.38 g/L, pH adjusted to 7.65 with NaOH) supplemented with 0.5 mM EDTA for 7 minutes. The second perfusion with warm perfusion buffer plus 0.5 mg/mL collagenase from *Clostridium histolyticum* (Sigma-Aldrich) and 10 mM CaCl<sub>2</sub> was subsequently performed for 3 minutes. Digested livers were isolated in warm hepatocyte culture medium (William's E medium Glutamax supplement (Thermo Fisher Scientific, Waltham, MA) with 1x Antibiotic-antimycotic (Thermo Fisher Scientific), 0.1 % BSA (Life technologies, Carlsbad, CA) and 25 nM dexamethasone (Sigma-Aldrich)) with 10% FCS. Cell pellets were washed with hepatocyte culture medium twice with FCS (Sigma-Aldrich). Isolated hepatocytes were plated on plates coated with collagen type I (Sigma-Aldrich) in hepatocyte culture medium with 10% FCS. The culture media were replaced 3-4 hours after plating with hepatocyte culture medium without FCS.

## CELL VIABILITY ASSAY

Culture media were removed and primary hepatocytes were lysed in Cell Titer Glo solution (Promega, Madison, WI) diluted 1:6 in PBS. Cells were incubated on a shaker for 10 minutes, and lysates were transferred to opaque 96-well plates for measurement. Luminescence was quantified with Mithras (Berthold, Bad Wildbad, Germany).

## TISSUE RNA EXTRACTION AND RT-QPCR

Snap-frozen liver pieces were grinded into fine powder with a mortar and a pestle and RNA was extracted from livers using RNeasy Mini kit (Qiagen, Hilden, Germany). Purified RNA was subsequently employed for cDNA synthesis using RevertAid First Strand cDNA Synthesis Kit and poly-A primer (Thermo Scientific). Synthesised cDNA was used for RT-PCR, with FastStart Universal Probe Master (Rox) and Universal Probe system (Roche, Basel, Switzerland) and specific sets of primers:

|                      |                             |
|----------------------|-----------------------------|
| <i>Tnf</i> forward   | CTGTAGCCCACGTCGTAGC         |
| <i>Tnf</i> reverse   | TTGAGATCCATGCCGTTG          |
| <i>Hprt</i> forward  | TGATAGATCCATTCCTATGACTGTAGA |
| <i>Hprt</i> reverse  | AAGACATTCTTTCCAGTTAAAGTTGAG |
| <i>Ccl3</i> forward  | TGCCCTTGCTGTTCTTCTCT        |
| <i>Ccl3</i> reverse  | GTGGAATCTTCCGGCTGTAG        |
| <i>Cxcl1</i> forward | GACTCCAGCCACACTCCAAC        |
| <i>Cxcl1</i> reverse | TGACAGCGCAGCTCATTG          |

## WESTERN BLOTTING

Proteins separated on polyacrylamide gels were transferred to nitrocellulose membranes by wet or semi-dry transfer. Membranes were blocked with 2.5 % skimmed milk (Sigma-Aldrich) in PBS-T plus 0.02% sodium azide (Sigma-Aldrich) for 1 hour, and were washed briefly with PBS-T and were incubated with primary antibodies (listed in Supplementary Table) diluted in 2.5% BSA (VWR) in PBS-T plus 0.1% sodium azide. Membranes were washed briefly with PBS-T and were subsequently

incubated with host/isotype-matched HRP-conjugated secondary antibodies (Southern Biotech). Membranes were developed with ECL plus substrate (Thermo Fisher Scientific).

## **RNA-SEQ**

Total RNA was extracted from non-tumor and nodular liver tissues from eighteen month-old *Hoip*<sup>*Ahep*</sup> mice using RNeasy mini (Qiagen). For library preparation, samples were processed using Kapa Stranded RNA-Seq with RiboErase sample preparation kit (Kapa Biosystems, Wilmington, MA) according to manufacturer's instructions. Briefly, single-stranded DNA probes complementary to mouse ribosomal RNA (rRNA) sequence were hybridized to 500 ng of each total RNA sample. RNase H was then used to degrade DNA-RNA hybrids while leaving any single stranded RNA intact. DNA probes were subsequently degraded using DNase I. The remaining RNA was then purified, fragmented using chemical fragmentation (heat and divalent metal cation) and primed with random hexamers. Strand-specific first strand cDNA was generated using reverse transcriptase in the presence of actinomycin D. This allows for RNA-dependent synthesis while preventing spurious DNA-dependent synthesis. The second cDNA strand was synthesized using dUTP in place of dTTP, to mark the second strand. The resultant cDNA is then A-tailed at the 3' end to prevent self-ligation and adapter dimerisation. Truncated adaptors, containing a T-overhang are ligated to the A-tailed cDNA. Successfully ligated cDNA molecules were then enriched with limited cycle PCR (10 cycles). Of note, the first strand is amplified for sequencing. The primers used extend the adaptor to full length and contain sequences that allow each libraries to be uniquely identified by way of a 6bp index sequence. Libraries are pooled in a single run in equimolar quantities, calculated from Qubit (Thermo Fisher Scientific) and bioanalyser fragment analysis. Samples were then sequenced on NextSeq 500 instrument (Illumina, San Diego, CA) using a 43bp paired end protocol.

The sequence data in FASTQ sequence results were aligned by RNA-Seq alignment app (Illumina, Basescope) to obtain read counts of each gene. Spliced transcripts alignment to a reference (STAR) was employed as the preferred aligner. Read counts of each gene were then translated to a relative expression profiling analysis using DESeq2 (Illumina Basescope) to compare the expression profiles

of nodular samples versus non-tumor samples. 714 genes are identified to be statistically significantly upregulated or downregulated ( $q$ -value  $< 0.05$ ) in the nodular samples and plotted to a heatmap by clustering analysis. Top 182 genes differentially expressed in the tumor samples ( $\log_2(\text{tumor/non-tumor}) > 1.2$ ) were subjected to enriched neighborhood-based sets (NESTs) and enriched gene ontology(GO)-based sets analyses using the ConsensusPathDB platform (Max Planck Institute for Molecular Genetics, Germany, <http://www.molgen.mpg.de/>).

## Supporting Table: primary antibody lists

### Western blot

| antibody                   | manufacturer       | catalogue number | host/isotype |
|----------------------------|--------------------|------------------|--------------|
| Bax                        | Santa Cruz         | sc-7480          | mouse IgG2b  |
| Bcl-2                      | Santa Cruz         | sc-7382          | mouse IgG1   |
| Bcl-X <sub>L</sub>         | Cell signaling     | 2764             | rabbit       |
| Bid                        | R&D systems        | AF860            | goat         |
| caspase-8                  | Enzo Life Sciences | ALX-804-447      | rat          |
| caspase-9                  | Cell Signaling     | 9508             | mouse IgG1   |
| c-FLIP                     | Adipogen           | AG-20B-0005      | rat          |
| cIAP1/2                    | R&D systems        | 315301           | mouse IgG2a  |
| cleaved caspase-3          | Cell Signaling     | 9661             | rabbit       |
| cleaved caspase-8          | Cell Signaling     | 9429             | rabbit       |
| ERK1/2                     | Cell Signaling     | 9102             | rabbit       |
| FADD                       | Assay Design       | AAM-121          | mouse IgG1   |
| GAPDH                      | Abcam              | ab8245           | mouse IgG1   |
| HOIL-1                     | homemade           | -                | mouse IgG2a  |
| HOIP                       | homemade           | -                | rabbit       |
| IκBα                       | Cell Signaling     | 9242             | rabbit       |
| JNK                        | Cell Signaling     | 9258             | rabbit       |
| Mcl-1                      | Cell signaling     | 94296            | rabbit       |
| phospho-ERK<br>(T202/Y204) | Cell Signaling     | 9101             | rabbit       |
| phospho-IκBα<br>(S32/S36)  | Cell Signaling     | 9246             | mouse IgG1   |
| phospho-JNK<br>(T183/Y185) | Cell Signaling     | 4671             | rabbit       |
| RIPK1                      | BD Biosciences     | 610459           | mouse IgG2a  |
| RIPK3                      | Enzo Life Sciences | ADI-905-242      | rabbit       |
| SHARPIN                    | Proteintech        | 14626-1-AP       | rabbit       |
| XIAP                       | Cell Signaling     | 2042             | rabbit       |

### Immunohistochemistry

| antibody | manufacturer   | catalogue number | host/isotype |
|----------|----------------|------------------|--------------|
| CK19     | BioRad         | AHP1846          | rabbit       |
| F4/80    | AbD serotec    | MCA497G          | rat          |
| GS       | Abcam          | ab73593          | rabbit       |
| γH2AX    | Cell Signaling | 9718             | rabbit       |
| HNF4     | Abcam          | ab41898          | mouse IgG2a  |
| Ki-67    | Abcam          | ab16667          | rabbit       |
| Ly6G     | Biolegend      | 4767             | rat          |

#### Flow cytometry

| antibody | manufacturer | catalogue number | fluorophore     |
|----------|--------------|------------------|-----------------|
| B220     | Biolegend    | 103243           | BV650           |
| CD3      | Biolegend    | 100326           | PerCP           |
| CD4      | eBioscience  | 25-0041-82       | PE-Cy7          |
| CD45     | Biolegend    | 103128           | Alexa Fluor 700 |
| CD8      | Biolegend    | 100714           | APC-Cy7         |
| F4/80    | Biolegend    | 123110           | PE              |
| Ly6G     | Biolegend    | 127606           | FITC            |
| NK1.1    | Biolegend    | 108731           | BV421           |

## Supporting Figure Legends

### Supporting Fig. S1.

(A) Levels of LUBAC components in primary hepatocytes from *Hoip<sup>flox</sup>* and *Hoip<sup>Ahep</sup>* mice at eight-to-nine weeks of age. (B) TNF-RSC pull-down from hepatocyte lysates of *Hoip<sup>flox</sup>* and *Hoip<sup>Ahep</sup>* mice and the precipitates were immunoblotted for linear ubiquitin and LUBAC components. Hepatocytes were stimulated with 200 µg/mL FLAG-tagged TNF for 15 minutes. (C) Survival curves for *Hoip<sup>flox</sup>* (open circle) and *Hoip<sup>Ahep</sup>* mice (closed circle) up to eighteen months (*Hoip<sup>flox</sup>*: n=11, *Hoip<sup>Ahep</sup>*: n=15).

### Supporting Fig. S2.

(A) Representative macroscopic pictures of eighteen month-old livers of *Hoip<sup>flox</sup>* and *Hoip<sup>Ahep</sup>* mice. Black arrowheads indicate large nodules and white arrowheads indicate cystic lesions. (B) Cystic lesions in eighteen month-old livers from *Hoip<sup>Ahep</sup>* mice. (C) GS and CK19 staining of non-tumoral and tumoral areas of livers obtained from *Hoip<sup>Ahep</sup>* mice. (D) H&E staining of representative steatotic lesions in *Hoip<sup>Ahep</sup>* mice. S: steatotic lesions.

### Supporting Fig. S3.

Immunostaining of F4/80 and Ly6G in the livers of *Hoip<sup>flox</sup>* and *Hoip<sup>Δhep</sup>* mice at four weeks of age, indicated in red. White arrowheads show accumulation of stained cells.

### Supporting Fig. S4.

(A) A plot of serum levels of ALT and alkaline phosphatase (AP) (left panel) and serum bilirubin levels (right panel) of *Hoip<sup>flox</sup>* and *Hoip<sup>Δhep</sup>* mice at 4 weeks of age. (B) Representative picture of cleaved caspase-3 and TUNEL staining in the livers of *Hoip<sup>flox</sup>* and *Hoip<sup>Δhep</sup>* mice at two weeks of age. (C) The liver lysates of *Hoip<sup>flox</sup>* and *Hoip<sup>Δhep</sup>* mice at four weeks of age was immunoblotted for cleaved caspase-8. (D) Levels of pro-apoptotic and anti-apoptotic proteins evaluated in hepatocytes from *Hoip<sup>flox</sup>* and *Hoip<sup>Δhep</sup>* mice. (E) Phosphorylation of JNK and IκBα was evaluated in hepatocytes from *Hoip<sup>flox</sup>* and *Hoip<sup>Δhep</sup>* mice.

### Supporting Fig. S5.

(A) Hepatocytes from *Cd95-DD<sup>Δhep</sup> Tnfr1<sup>KO</sup> Hoip<sup>Δhep</sup>* mice (CΔ) were treated with CD95L-Fc as well as *Hoip<sup>Δhep</sup>* (Δ) cells and the lysates were immunoblotted for active caspases. (B) The levels of serum alanine aminotransferase (ALT) in *Cd95-DD<sup>flox</sup> Tnfr1<sup>KO</sup> Hoip<sup>flox</sup>* (open square) and *Cd95-DD<sup>Δhep</sup> Tnfr1<sup>KO</sup> Hoip<sup>Δhep</sup>* mice (closed square) at six weeks of age. (C) An immunoprecipitation of the FADD-associated complex in zVAD-treated (24 hours) primary hepatocytes from *Hoip<sup>flox</sup>* (F), *Hoip<sup>Δhep</sup>* (Δ) and *Cd95-DD<sup>Δhep</sup> Tnfr1<sup>KO</sup> Hoip<sup>Δhep</sup>* (CΔ) mice.



**Fig S1****A**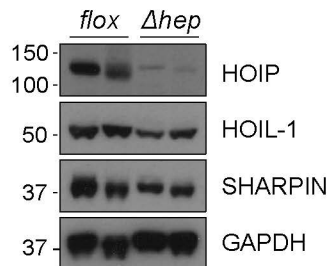**C**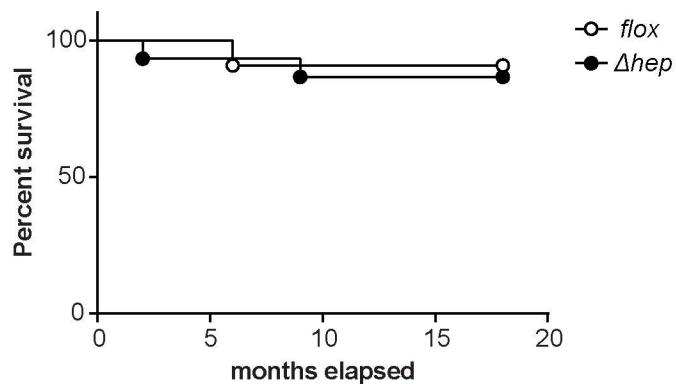**B**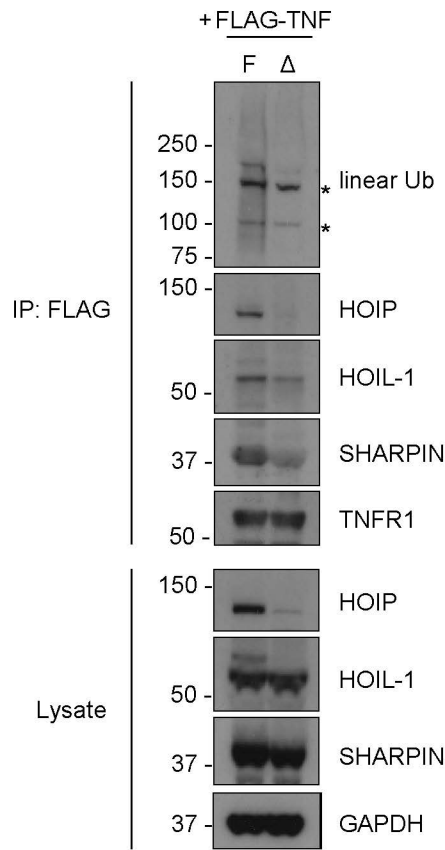

**Fig S2****A**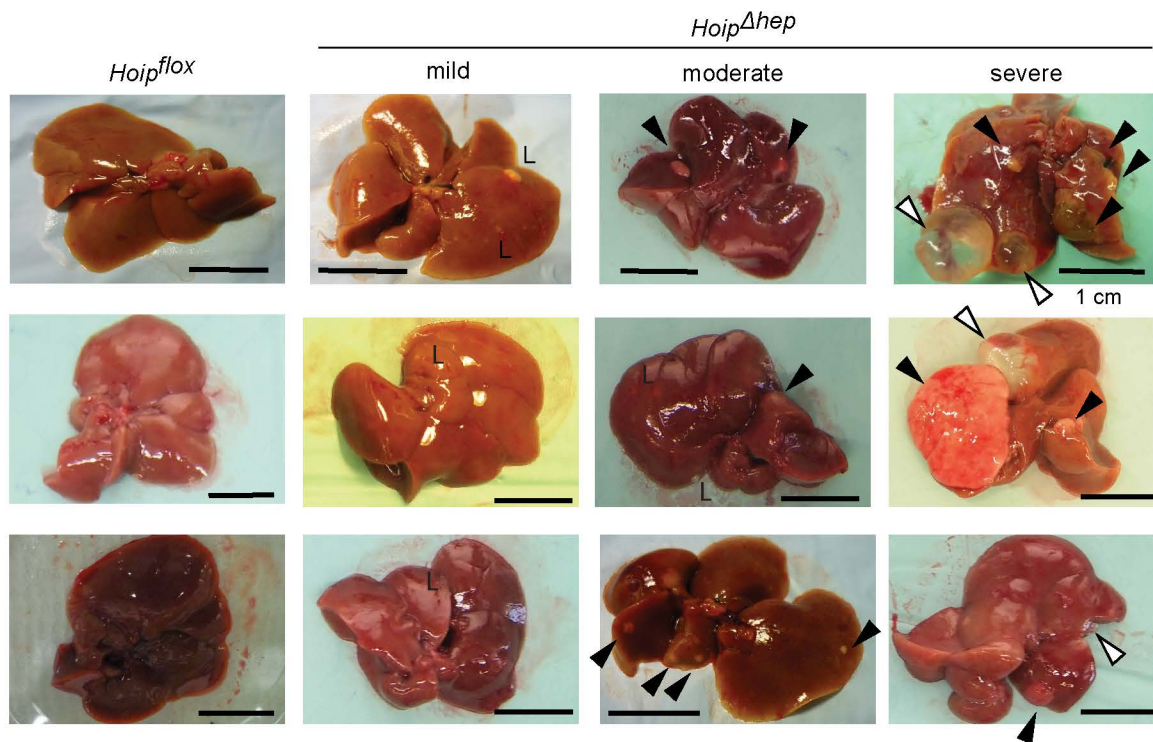**B**

cystic lesion

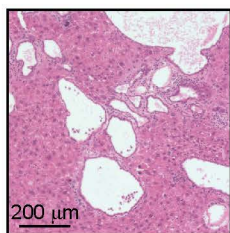**C**

GS

CK19

Non-tumor

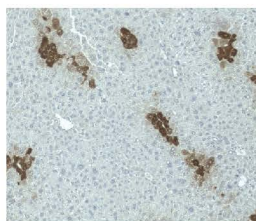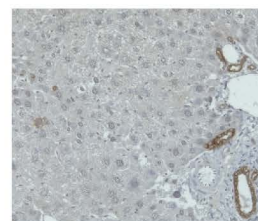

Tumor 1

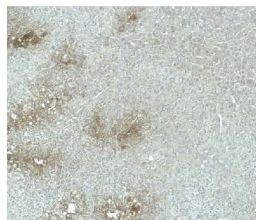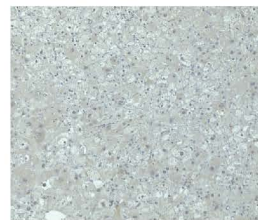

Tumor 2

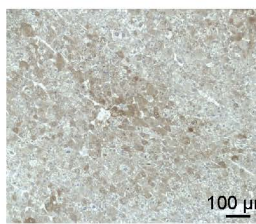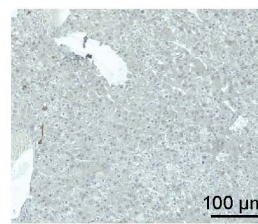**D***Hoip<sup>flox</sup>**Hoip<sup>Δhep</sup>*

steatotic lesion

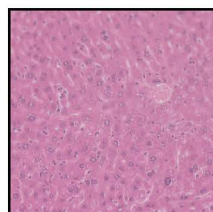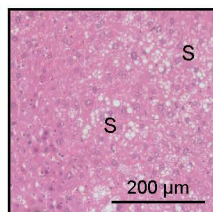

**Fig S3**

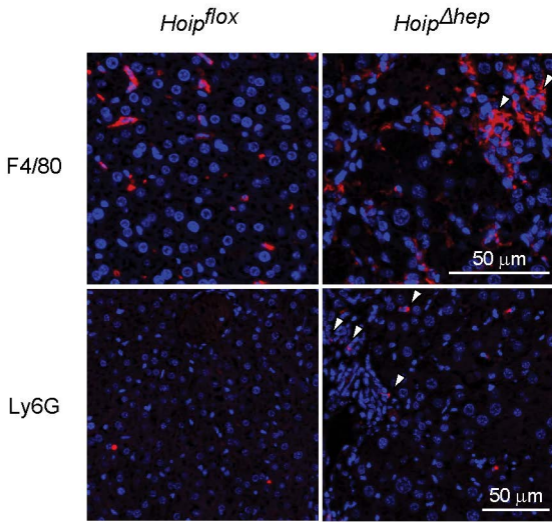

**Fig S4**

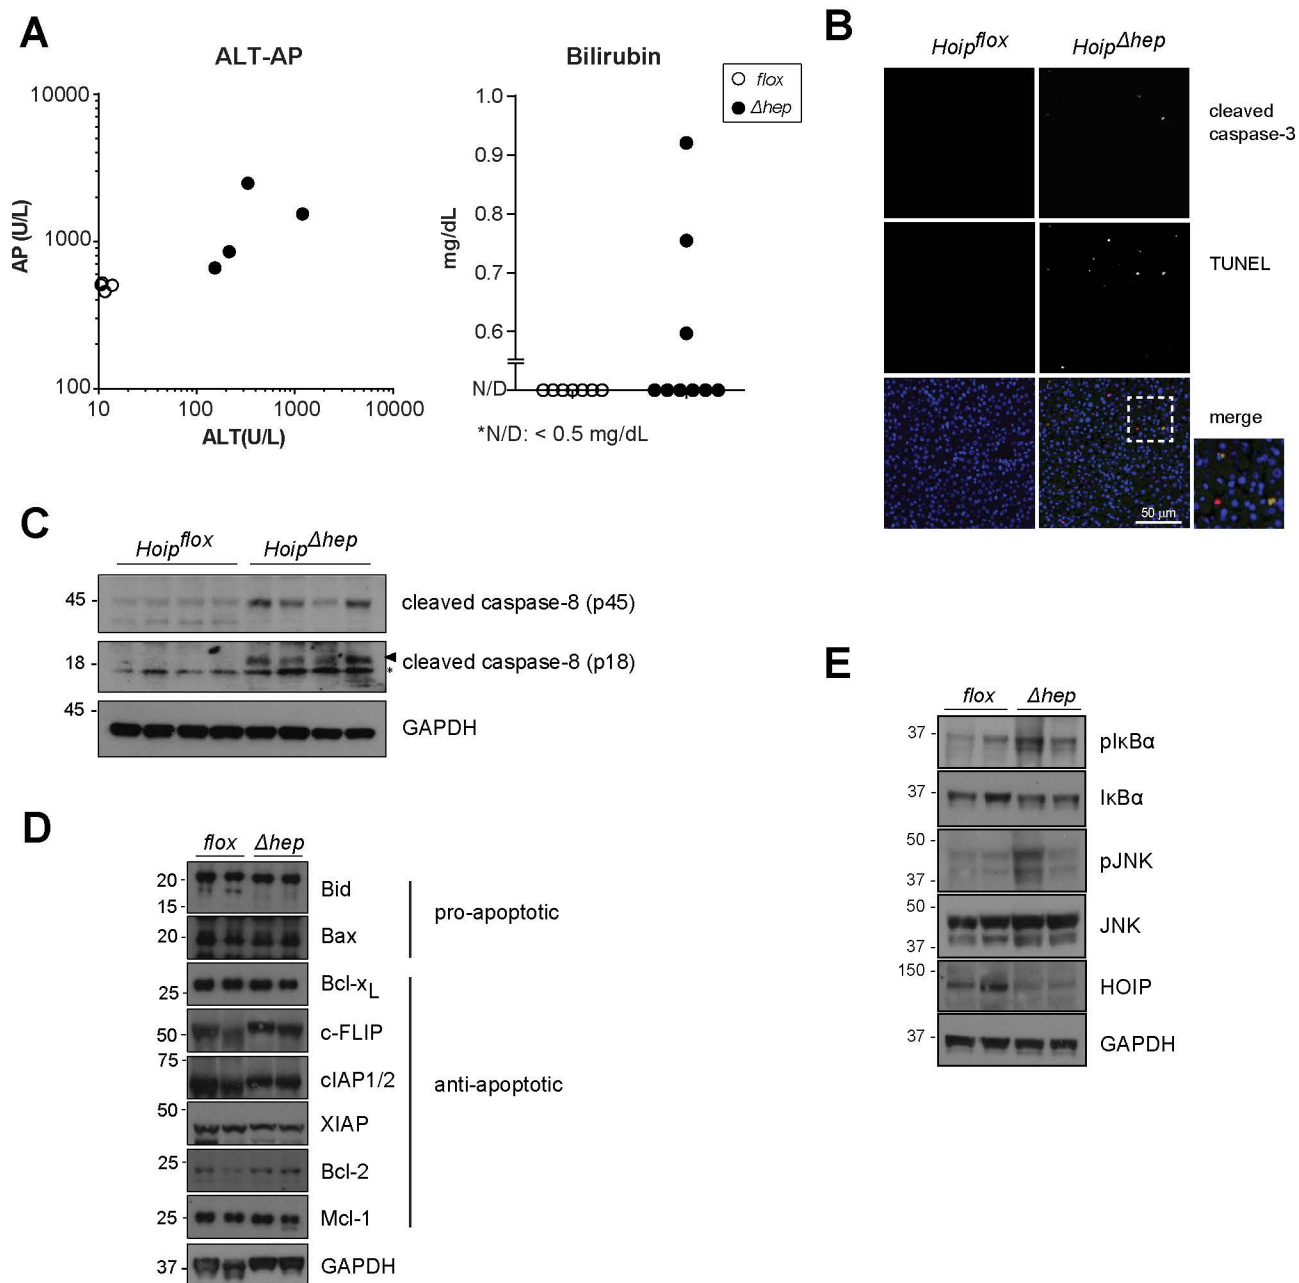

# Fig S5

## A

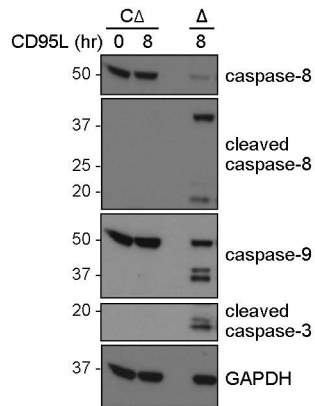

## B

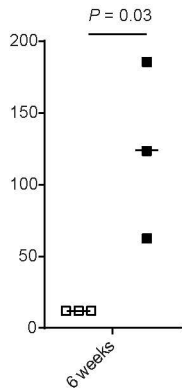

□ *Hoip*<sup>Δhep</sup>  
 ■ *Cd95-DDΔhep Tnfr1<sup>KO</sup> Hoip*<sup>Δhep</sup>

## C

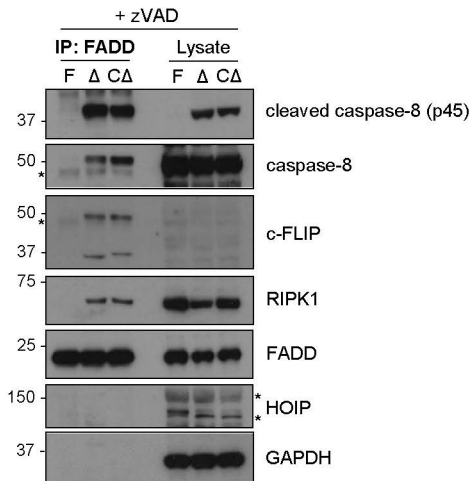

F: *Hoip*<sup>flox</sup>  
 Δ: *Hoip*<sup>Δhep</sup>  
 CΔ: *Cd95-DDΔhep Tnfr1<sup>KO</sup> Hoip*<sup>Δhep</sup>
